# Supplementary material
Source: publisher figshare collection journal article supplement (https://sage.figshare.com/ndownloader/files/16356059)
Supplement: Supplementary file 1 [file 16356059]

**Exploring The Impact of a Dual Occupancy Neonatal Intensive Care Unit on Staff Workflow, Activity, and Their Preceptions**

**Authors:** Broom, M., Kecskes, Z., Kildea, Sue., Gardner, A.

**Course ID #** HERD72

| Full Name | AIA # / EDAC # | Email | Phone # |
|-----------|----------------|-------|---------|
|           |                |       |         |

**Learning Objective 1:** To understand the benefits of small room design for babies and families.

**Learning Objective 2:** To recognize the impact of single or dual occupancy (DO) design on staff workflow and clinical practice.

**Learning Objectives 3:** To recognize the challenges and strategies to manage the impact of introducing small room design; such as isolation of staff and last of learning through direct observation.

**Learning Objective 4:** To understand that increased flexibility in the support and education staff roles will assist in managing small room design impacts; such as staff walking distance and work practices, whilst still allowing the benefits.

**Question 1:** List the benefits of small room designs revealed by the research mentioned by this paper.

---

---

**Question 2:** What are the possible impacts of single or dual occupancy (DO) design on staff workflow & practice?

---

---

**Question 3:** List two challenges to be managed when moving to a small room design & a strategy to manage those challenges.

---

---

To earn AIA continuing education units please complete form, and email Jill Glaser at [jglaser@healthdesign.org](mailto:jglaser@healthdesign.org) and your credits will be uploaded to your AIA account. To earn EDAC continuing education units please complete the form, retain the form for your records and self-submit the credits at the time of your EDAC renewal. The form is your “proof of attendance.”
